# Supplementary material for: Gold nanoclusters based dual-emission hollow TiO2 microsphere for ratiometric optical thermometry
Source: Royal Society of Chemistry journal article supplement (doi:10.1039/c5ra13475g), 2015-01-01
Supplement: c5ra13475g1.pdf [file c5ra13475g1.pdf]

## Gold nanoclusters based dual-emission hollow TiO<sub>2</sub> microsphere for ratiometric optical thermometry

Chuanxi Wang,<sup>\*a</sup> Yijun Huang,<sup>a</sup> Huihui Lin,<sup>a</sup> Zhenzhu Xu,<sup>a</sup> Jiapeng Wu,<sup>a</sup> Mark G. Humphrey<sup>b</sup> and Chi Zhang<sup>\*a</sup>

<sup>a</sup>China-Australia Joint Research Centre for Functional Molecular Materials, School of Chemical & Material Engineering, Jiangnan University, Wuxi 214122, P. R. China

<sup>b</sup>Research School of Chemistry, Australian National University, Canberra, ACT 0200, Australia

E-mail address: [chizhang@jiangnan.edu.cn](mailto:chizhang@jiangnan.edu.cn) (C. Zhang); [wangcx@jiangnan.edu.cn](mailto:wangcx@jiangnan.edu.cn) (C. X. Wang)

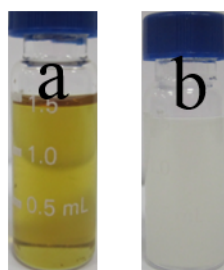

**Fig S1.** Photographs of resultant CDs in chloroform solution (a) and resultant CDs/TiO<sub>2</sub> hollow microspheres in aqueous solution (b).

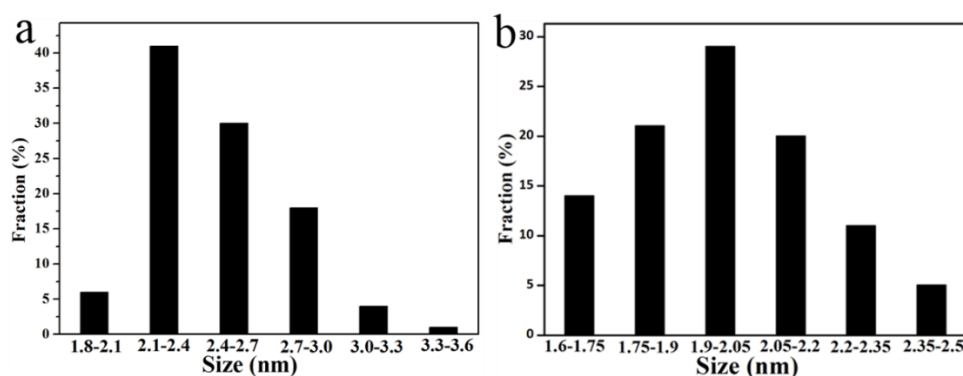

**Fig S2.** The size distribution of (a) CDs, the average size was 2.5 nm; (b) AuNCs, the average size was 2.1 nm

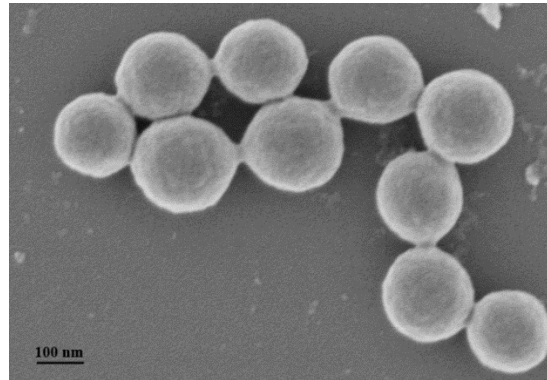

**Fig S3.** SEM image of resultant CDs/TiO<sub>2</sub> hollow microspheres

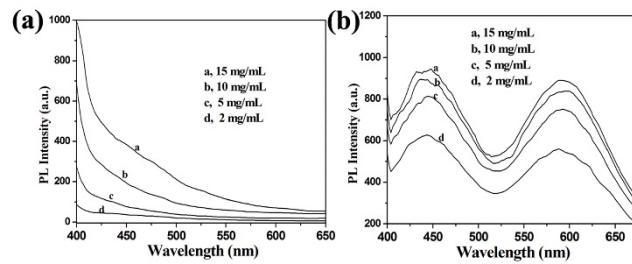

**Fig S4.** Fluorescence spectra of (a) TiO<sub>2</sub> microspheres and (b) dual-emission fluorescent hollow microspheres at various concentrations.

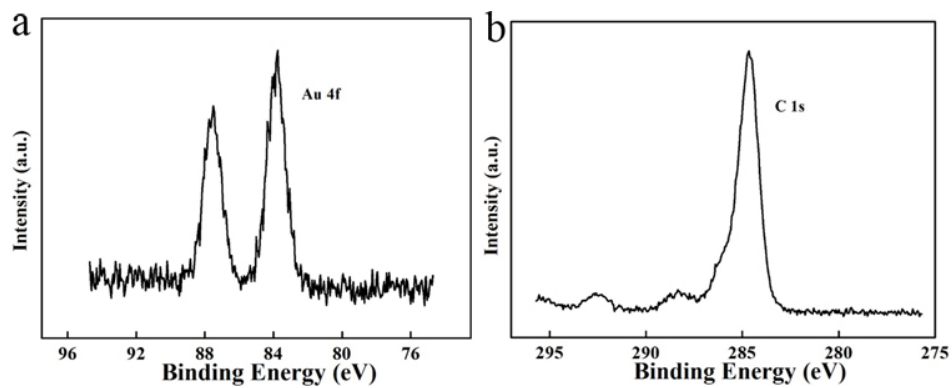

**Fig S5.** X-ray photoelectron spectroscopy (XPS) spectra show the binding energy of Au 4f (a) and C 1s (b) of dual-emission nanosensor.

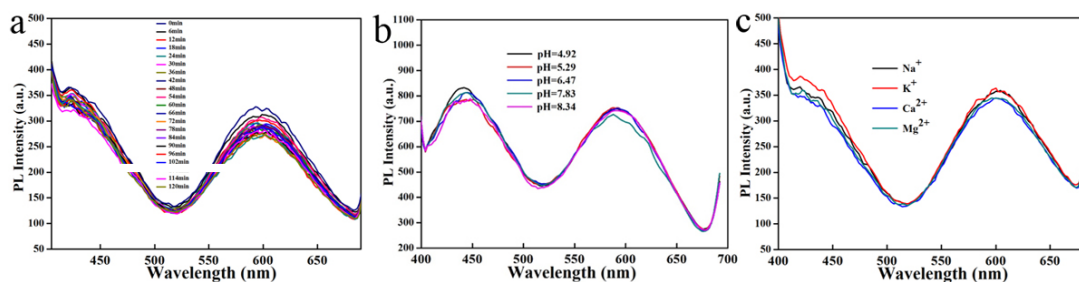

**Fig S6.** The fluorescent stability of dual-emission fluorescent nanosensor: a, photostability of as-prepared nanosensor radiated by a 450 W Xe light at various time; b, the pH stability of nanosensor in various pH values; c, the metal stability of nanosensor in various metal ions with the concentration of 200 mM.

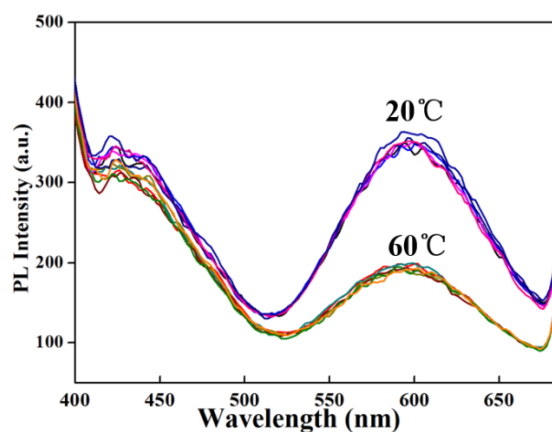

**Fig S7.** PL intensity upon the cyclic switching of dual-emission fluorescent nanosensor under alternating conditions between 20 °C and 60 °C.

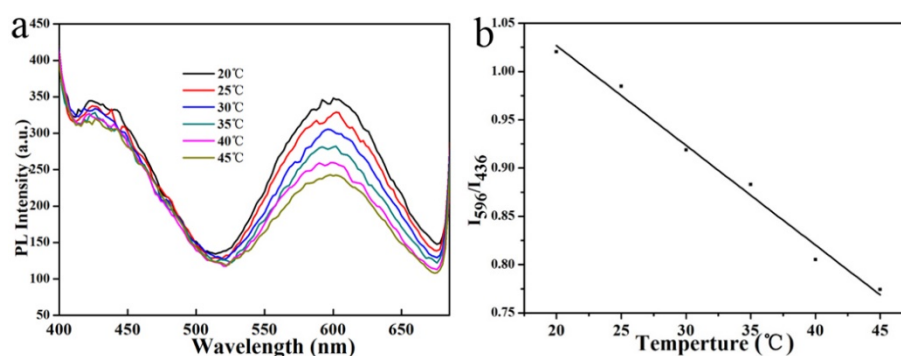

**Fig S8.** a, Fluorescence emission spectra of dual-emission nanosensor for various temperatures in the range 20 °C to 45 °C (top to bottom) in the PBS solution (pH=7.4); b, the ratio of the intensity at 596 nm and 436 nm ( $I_{596}/I_{436}$ ) is plotted versus temperature.
